# Supplementary material
Source: PubMed Central journal article supplement (PMC4793808)
Supplement: soon018049.ww1_default.pdf [file soon018049.ww1_default.pdf]

**GOVERNMENT HEALTH INSURANCE FOR THE POOR IN INDIA: A QUASI-EXPERIMENTAL  
EVALUATION OF INSURANCE AND HEALTH OUTCOMES**

**[SUPPLEMENTARY APPENDIX]**

Neeraj Sood PhD<sup>1,2,3</sup>, Eran Bendavid MD MS<sup>4,5</sup>

Arnab Mukherji PhD<sup>6</sup>, Zachary Wagner MIA<sup>7</sup>,

Somil Nagpal MD MBA<sup>8</sup>, Patrick Mullen PhD<sup>8</sup>

<sup>1</sup> Associate Professor, Department of Pharmaceutical Economics and Policy, University of Southern California, Los Angeles, CA

<sup>2</sup> Leonard D. Schaeffer Center for Health Policy and Economics, University of Southern California, Los Angeles, CA

<sup>3</sup> National Bureau of Economic Research, Cambridge, MA.

<sup>4</sup> Assistant Professor, Division of General Medical Disciplines, Stanford University, Stanford, CA

<sup>5</sup> Center for Health Policy and the Center for Primary Care and Outcomes Research, Stanford University, Stanford, CA

<sup>6</sup> Associate Professor, Center for Public Policy, Indian Institute of Management Bangalore, Bangalore, India

<sup>7</sup> PhD Student, School of Public Health, UC Berkeley, Berkeley, CA

<sup>8</sup> Senior Health Specialists, World Bank, New Delhi, India

## Supplementary Figures

**Figure A1.** Fraction of Households That Reported a Death During the Previous Year From a Cardiac Condition

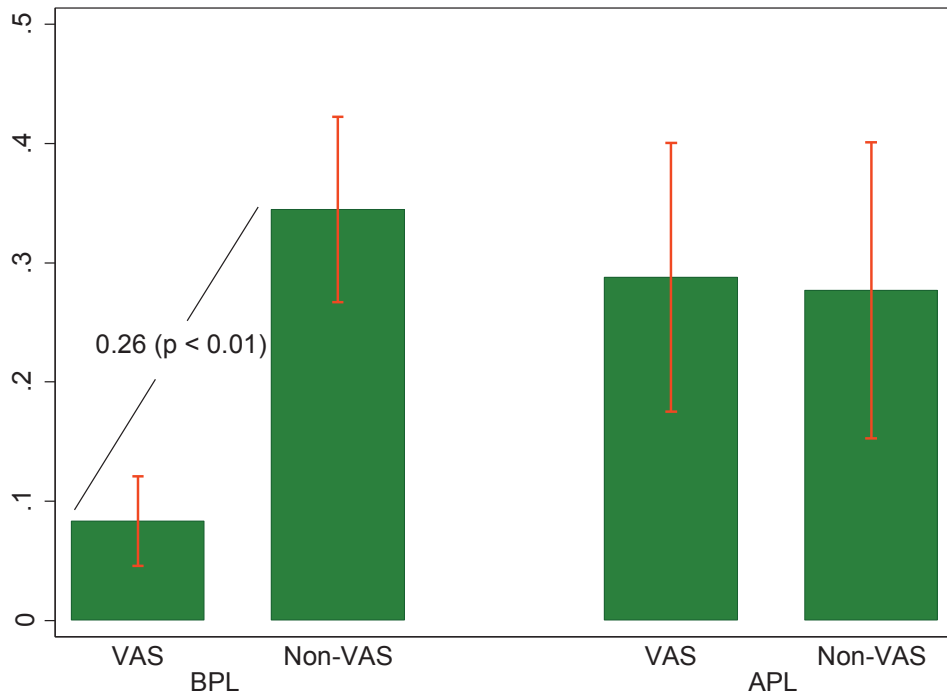

**Notes:** Results of a sensitivity analysis comparing cardiac mortality rates for VAS-eligible and VAS-ineligible households. Red bars represent 95% confidence intervals. This figure shows that households below the poverty line on the VAS-eligible side of the border had lower mortality from cardiac conditions, but there was no difference among households above the poverty line. Standard errors were clustered at the village level.

BPL= Below the poverty line

APL= Above the poverty line (households above the poverty line are not eligible for VAS)

VAS= On the northern VAS-eligible side of the border

Non-VAS= On the southern VAS-ineligible side of the border

**Figure A2.** Fraction of Households That Reported a Death During the Previous Year From Cancer

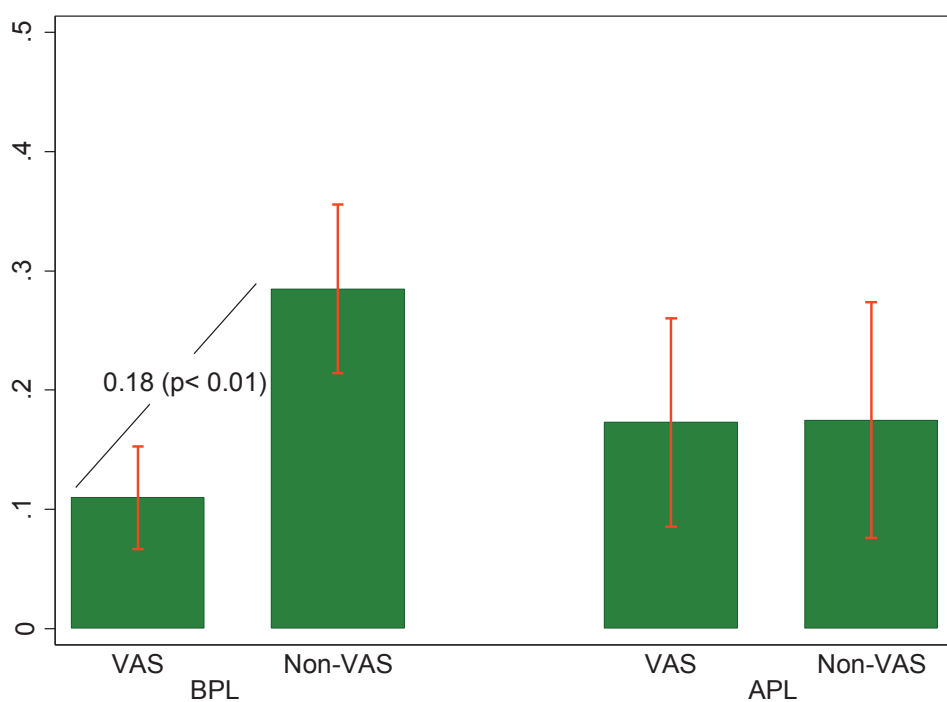

**Notes:** Results of a sensitivity analysis comparing cancer mortality rates for VAS-eligible and VAS-ineligible households. Red bars represent 95% confidence intervals. This figure shows that households below the poverty line on the VAS-eligible side of the border had lower mortality from cardiac conditions, but there was no difference among households above the poverty line. Standard errors were clustered at the village level

BPL= Below the poverty line

APL= Above the poverty line (households above the poverty line are not eligible for VAS)

VAS= On the northern VAS-eligible side of the border

Non-VAS= On the southern VAS-ineligible side of the border

**Figure A3.** Fraction of Households That Reported a Death During the Previous Year From Conditions Not Covered By VAS

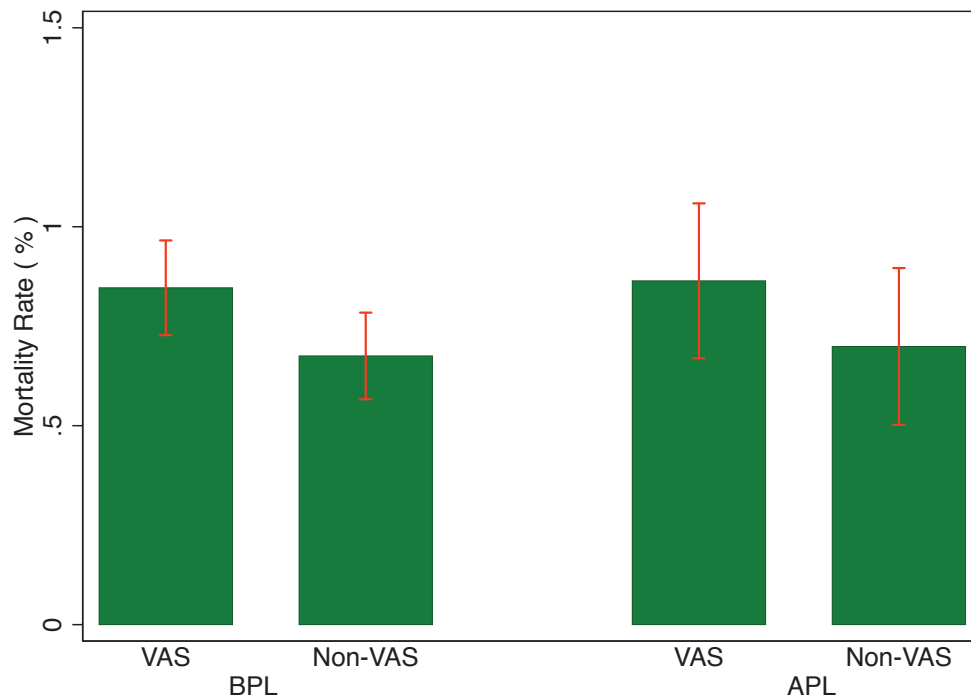

**Notes:** Results of a sensitivity analysis comparing mortality rates for conditions not covered by VAS for VAS-eligible and VAS-ineligible households. Red bars represent 95% confidence intervals. VAS and Non-VAS rates are not statistically different. This figure shows that VAS-eligible and VAS-ineligible households had similar mortality rates from uncovered conditions for household both below and above the poverty line

BPL= Below the poverty line

APL= Above the poverty line (households above the poverty line are not eligible for VAS)

VAS= On the Northern VAS-eligible side of the border

Non-VAS= On the Southern VAS-ineligible side of the border

**Figure A4.** Comparison of distributions of reason for hospitalization between VAS administrative\* data and household survey†

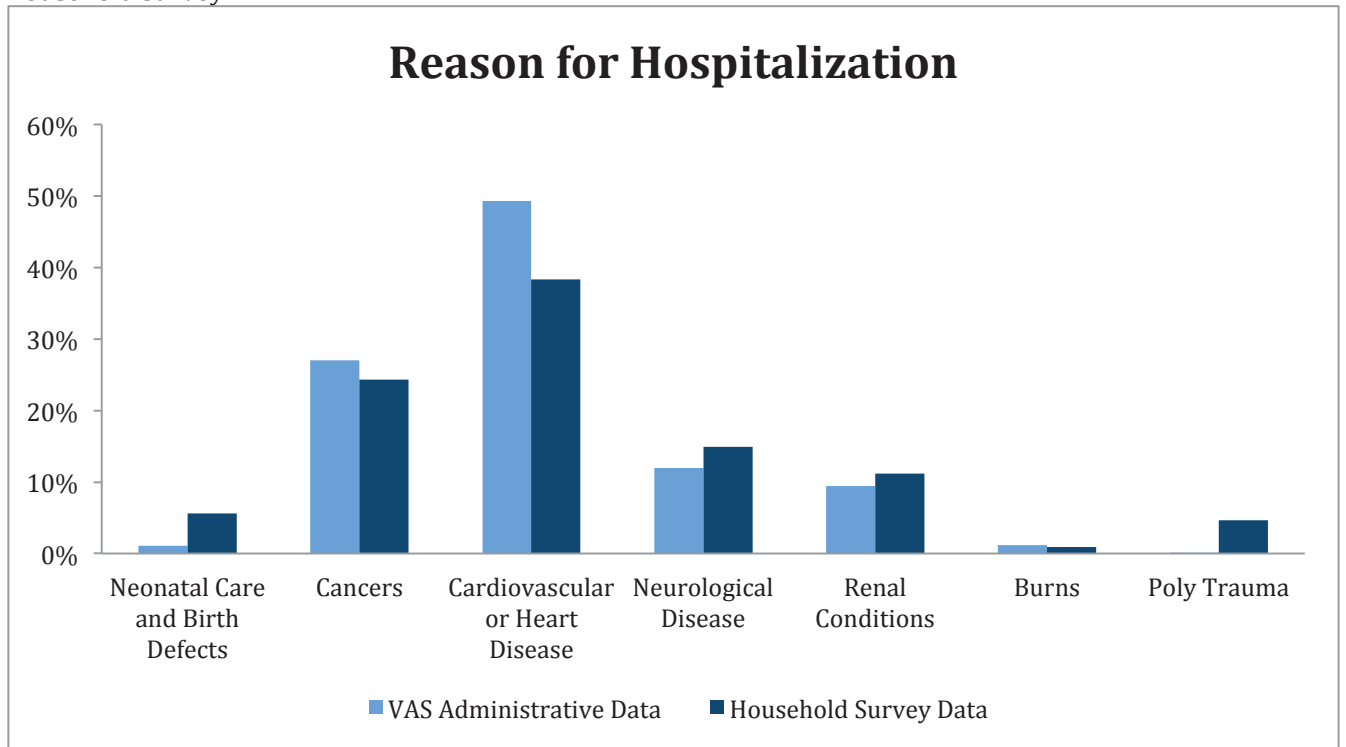

\* VAS administrative data is from study period in study districts only

† Household survey data is for VAS eligible households with a hospitalization at a facility capable of providing tertiary care

**Figure A5.** Comparison of distributions of cause death between India verbal autopsy report\* data and household survey†

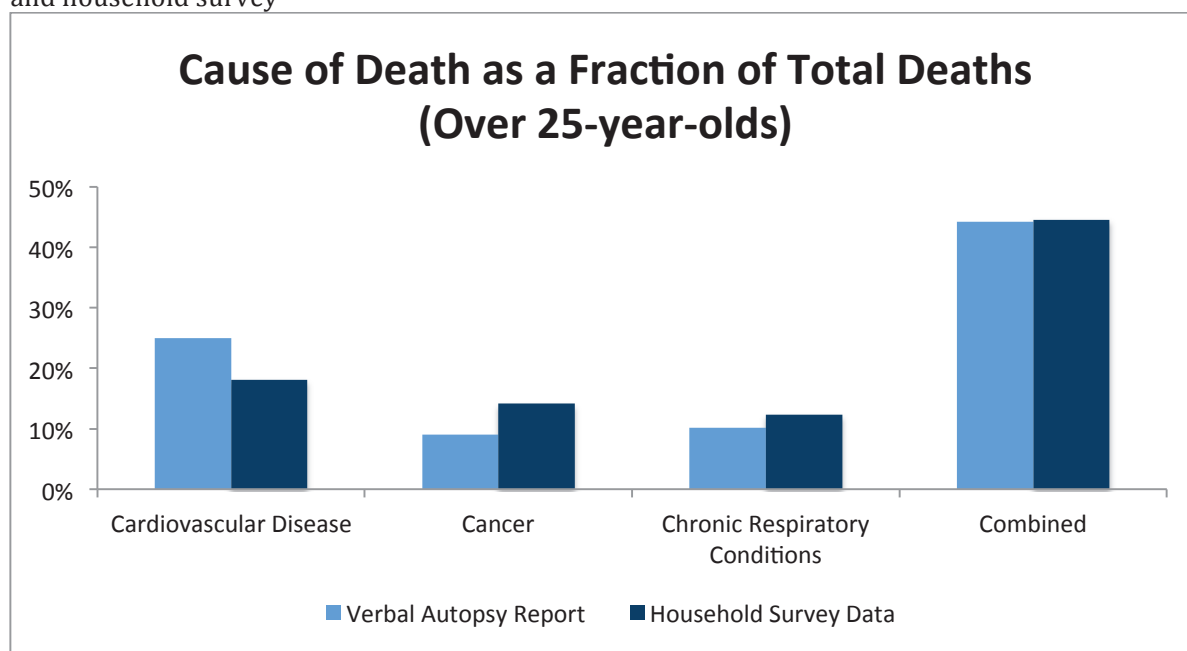

\* Verbal autopsy report, conducted from 2001-2003, determined cause of death using an advanced form of Verbal Autopsy called the "RHIME" or Representative, Re-sampled, Routine Household Interview of Mortality with Medical Evaluation in India. The report is representative of 27 Districts across India (6,645 sampling units, rural and urban) and is available from [http://www.icmr.nic.in/final/causes\\_death/causes\\_death.htm](http://www.icmr.nic.in/final/causes_death/causes_death.htm).

† Household survey data are for VAS-ineligible households only since VAS-eligible households are likely to have lower mortality for these conditions as a result of VAS.

**Figure A6.** Self-reported pre- and post-hospitalization outcomes for VAS beneficiaries

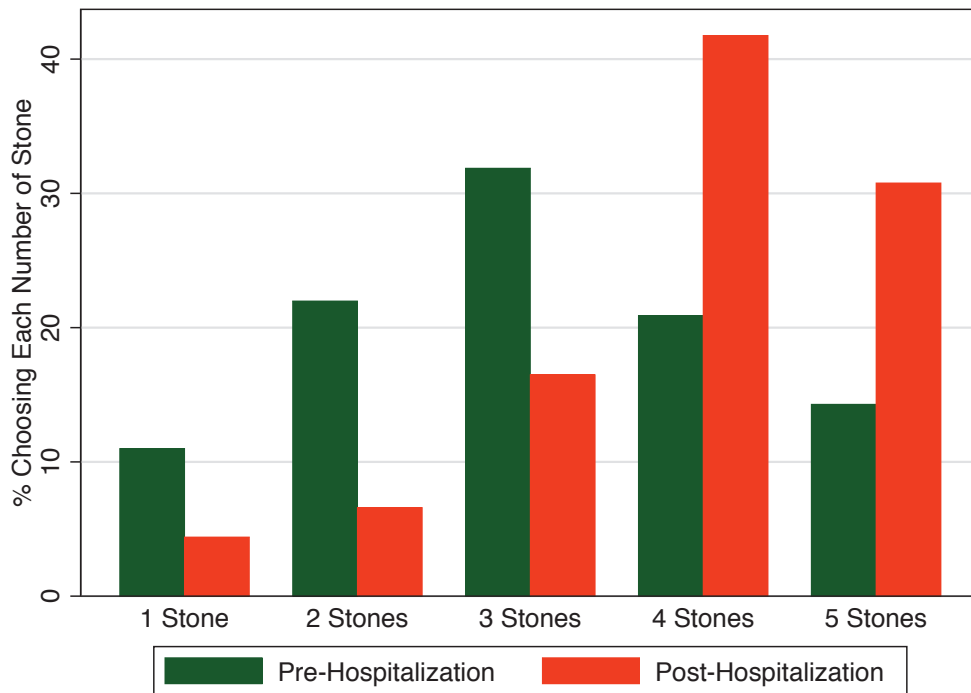

**Notes:** Responses based on questions asking respondents to place the number of stones into a cup that represents their overall health the few days before the hospitalization (Pre) and the day of the survey (Post). 5 stones indicates perfect health. 1 stone indicates extreme sickness. All respondents were sufficiently trained with practice questions prior. This figure implies that VAS beneficiaries improved after hospitalizations and were generally in good health on the date of the survey

**Figure A7.** Fraction of Households That Reported a Death During the Previous Year From a VAS Covered Condition (Below Poverty Line Households Without Card Included)

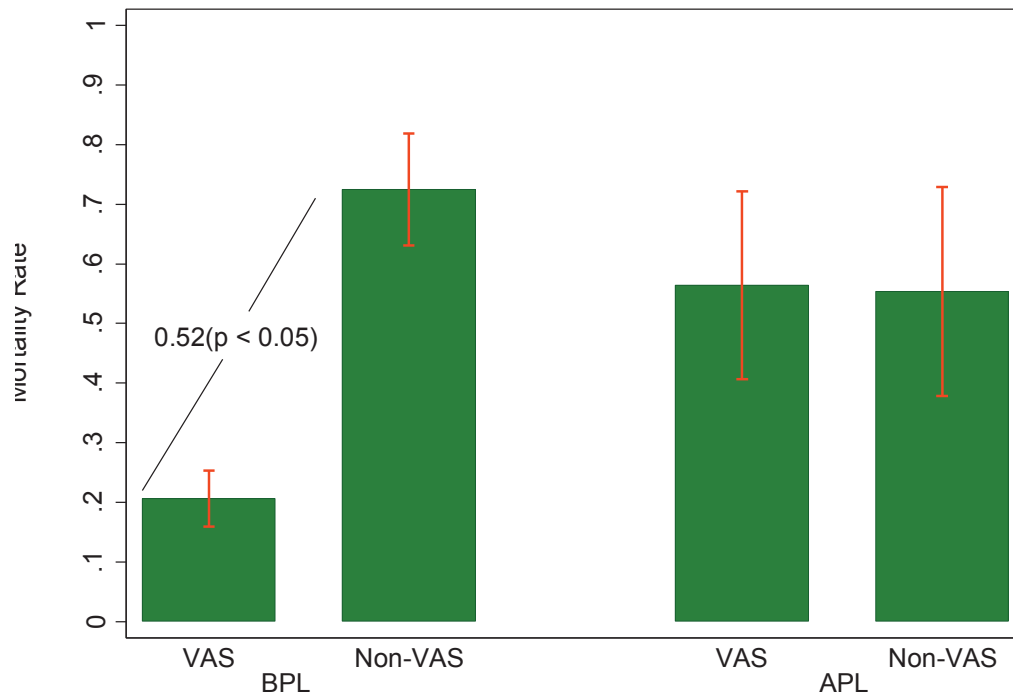

**Notes:** Main mortality results with households that reported being Below Poverty Line but that were unable to provide a Below Poverty Line card included with Below Poverty Line category. Red bars represent 95% confidence intervals. This figure shows that households below the poverty line on the VAS-eligible side of the border had lower mortality from cardiac conditions, but there was no difference among households above the poverty line. Standard errors were clustered at the village level

BPL= Below the poverty line

APL= Above the poverty line (households above the poverty line are not eligible for VAS)

VAS= On the northern VAS-eligible side of the border

Non-VAS= On the southern VAS-ineligible side of the border



## Tables

**Table A1.** Sensitivity analysis comparing utilization results when counting verified hospitalizations

|                                                                                          | % Difference         |                           |
|------------------------------------------------------------------------------------------|----------------------|---------------------------|
|                                                                                          | All Hospitalizations | Verified Hospitalizations |
| <b>% Of Households Using a Tertiary Care Facility for Potentially Covered Conditions</b> |                      |                           |
| All Facilities                                                                           | -5.4% (p = 0.64)     | -2.45% (p = 0.61)         |
| All Tertiary Care Facilities (TCFs)                                                      | 19.9% (p = 0.26)     | 16.15% (p = 0.44)         |
| Excluding Emergency Department                                                           | 42.7% (p=0.08)       | 33.39% (p = 0.22)         |

**Notes:** This table presents results from the same analysis as presented in Table 4 of the main paper compared with the same analysis only including hospitalizations that were verified by the interviewer

**Table A2:** Sensitivity analysis comparing out-of-pocket payment results when only counting verified hospitalizations

|                                | %Difference          |                           |
|--------------------------------|----------------------|---------------------------|
|                                | All Hospitalizations | Verified Hospitalizations |
| All Facilities                 | -39.5% (p < 0.01)    | -43.8%(p < 0.01)          |
| All Tertiary Care Facilities   | -60.2%(p < 0.01)     | -70.9%(p < 0.01)          |
| Excluding Emergency Department | -68.7%(p < 0.01)     | -76.4%(p < 0.01)          |

**Notes:** This table presents results from the same analysis as presented in Table 3 of the main paper compared with the same analysis only including hospitalizations that were verified by the interviewer

**Table A3. Mortality Rate for Eligible and Ineligible Districts (2004-2008)**

|                      | VAS-eligible | VAS-ineligible | P-value <sup>1</sup> |
|----------------------|--------------|----------------|----------------------|
| Any Household Member | 14.5%        | 14.0%          | 0.590                |
| Female Aged 15-49    | 1.4%         | 1.3%           | 0.771                |

Data are from the District Level Household Survey (N=6,346 households). Mortality rates are calculated by taking the share of the households with a death since January 1, 2004 using District Level Household Survey district household survey weights.

<sup>1</sup> Estimated from t-tests

| <b>Table A4. Complete list of procedures covered by VAS</b> |                        |                        |                                                                                                                                      |
|-------------------------------------------------------------|------------------------|------------------------|--------------------------------------------------------------------------------------------------------------------------------------|
| <b>Sl. No.</b>                                              | <b>Main Specialty</b>  | <b>Sub-specialty</b>   | <b>Procedure Name</b>                                                                                                                |
| 1                                                           | Burns                  | Burns                  | Up to 30% (with grafting)                                                                                                            |
| 2                                                           | Burns                  | Burns                  | Up to-40% with Scalds( Conservative/ without grafting)                                                                               |
| 3                                                           | Burns                  | Burns                  | Up to-40% Mixed Burns(with grafting)                                                                                                 |
| 4                                                           | Burns                  | Burns                  | Up to-50% with Scalds (Conservative)                                                                                                 |
| 5                                                           | Burns                  | Burns                  | Up to-50% Mixed Burns( with surgery grafting)                                                                                        |
| 6                                                           | Burns                  | Burns                  | Up to-60% with Scalds (Conservative)                                                                                                 |
| 7                                                           | Burns                  | Burns                  | Up to-60% Mixed Burns (with Surgeries)                                                                                               |
| 8                                                           | Burns                  | Burns                  | Above 60% Mixed Burns (with Surgeries)                                                                                               |
| 9                                                           | Burns                  | Burns                  | Post Burn Contracture surgeries for Functional Improvement(Package including splints, pressure garments and physiotherapy), Mild     |
| 10                                                          | Burns                  | Burns                  | Post Burn Contracture surgeries for Functional Improvement(Package including splints, pressure garments and physiotherapy), Moderate |
| 11                                                          | Burns                  | Burns                  | Post Burn Contracture surgeries for Functional Improvement(Package including splints, pressure garments and physiotherapy), Severe   |
| 12                                                          | Cardiology             | Cardiology             | PTCA - one stent (non-medicated)                                                                                                     |
| 13                                                          | Cardiology             | Cardiology             | PTCA - 2 stent (non-medicated)                                                                                                       |
| 14                                                          | Cardiology             | Cardiology             | Balloon Mitral Valvotomy                                                                                                             |
| 15                                                          | Cardiology             | Cardiology             | Coarctation dilatation                                                                                                               |
| 16                                                          | Cardiology             | Cardiology             | Balloon Pulmonary Valvotomy                                                                                                          |
| 17                                                          | Cardiology             | Cardiology             | Balloon Aortic Valvotomy                                                                                                             |
| 18                                                          | Cardiology             | Cardiology             | Peripheral Angioplasty withstent (non-medicated)                                                                                     |
| 19                                                          | Cardiology             | Cardiology             | Renal Angioplasty withstent (non-medicated)                                                                                          |
| 20                                                          | Cardiology             | Cardiology             | Both side renal Angioplasty withstent (non-medicated)                                                                                |
| 21                                                          | Cardiology             | Cardiology             | Vertebral Angioplasty                                                                                                                |
| 22                                                          | Cardiology             | Pacemaker Implantation | Temporary Pacemaker implantation                                                                                                     |
| 23                                                          | Cardiology             | Pacemaker Implantation | Permanent pacemaker implantation (only VVI) including Pacemaker value                                                                |
| 24                                                          | Cardiology             | Cardiology             | Pericardiocentesis                                                                                                                   |
| 25                                                          | Cardiology             | Device Closure         | PDA Device Closure                                                                                                                   |
| 26                                                          | Cardiology             | Device Closure         | ASD Device Closure                                                                                                                   |
| 27                                                          | Cardiology             | Device Closure         | VSD Device Closure                                                                                                                   |
| 28                                                          | Cardiology             | Coil Closure           | PDA Coil (one) insertion                                                                                                             |
| 29                                                          | Cardiology             | Coil Closure           | PDA Multiple coil insertion                                                                                                          |
| 30                                                          | Cardiology             | Cardiology             | IVUS                                                                                                                                 |
| 31                                                          | Cardiology             | Cardiology             | EP study                                                                                                                             |
| 32                                                          | Cardiology             | Cardiology             | RF Ablation                                                                                                                          |
| 33                                                          | Cardiology             | Cardiology             | 3D Mapping + Ablation                                                                                                                |
| 34                                                          | Cardiology             | Cardiology             | Medical treatment of Acute MI with Thrombolysis                                                                                      |
| 35                                                          | Cardiology             | Cardiology             | Thrombolysis for peripheral ischemia                                                                                                 |
| 36                                                          | Cardiology             | Cardiology             | Rotablation+ PTCA                                                                                                                    |
| 37                                                          | Cardiology             | Cardiology             | Rotablation+ PTCA+ Stent                                                                                                             |
| 38                                                          | Cardiothoracic Surgery | CABG                   | CABG                                                                                                                                 |
| 39                                                          | Cardiothoracic Surgery | CABG                   | CABG with IABP                                                                                                                       |
| 40                                                          | Cardiothoracic Surgery | CABG                   | CABG with Aneurismal repair                                                                                                          |

|    |                        |                      |                                       |
|----|------------------------|----------------------|---------------------------------------|
| 41 | Cardiothoracic Surgery | CABG                 | CABG with MV repair                   |
| 42 | Cardiothoracic Surgery | CABG                 | CABG with post MI VSD repair          |
| 43 | Cardiothoracic Surgery | Valve Repair         | Open Mitral Valvotomy                 |
| 44 | Cardiothoracic Surgery | Valve Repair         | Open Aortic Valvotomy                 |
| 45 | Cardiothoracic Surgery | Valve Repair         | Open Pulmonary Valvotomy              |
| 46 | Cardiothoracic Surgery | Valve Repair         | Mitral Valve Repair                   |
| 47 | Cardiothoracic Surgery | Valve Repair         | Tricuspid Valve Repair                |
| 48 | Cardiothoracic Surgery | Valve Repair         | Aortic Valve Repair                   |
| 49 | Cardiothoracic Surgery | Valve Replacement    | Mitral Valve Replacement              |
| 50 | Cardiothoracic Surgery | Valve Replacement    | Aortic Valve Replacement              |
| 51 | Cardiothoracic Surgery | Valve Replacement    | Double Valve Replacement              |
| 52 | Cardiothoracic Surgery | Valve                | Ross Procedure                        |
| 53 | Cardiothoracic Surgery | Congenital (Simple)  | ASD                                   |
| 54 | Cardiothoracic Surgery | Congenital (Simple)  | VSD                                   |
| 55 | Cardiothoracic Surgery | Congenital (Simple)  | AVSD/ AV Canal Defect                 |
| 56 | Cardiothoracic Surgery | Congenital (Simple)  | ICR for TOF                           |
| 57 | Cardiothoracic Surgery | Congenital (Simple)  | Pulmonary Valvotomy + RVOT Resection  |
| 58 | Cardiothoracic Surgery | Congenital (Simple)  | AP Window                             |
| 59 | Cardiothoracic Surgery | Congenital (Simple)  | Surgery for HOCM                      |
| 60 | Cardiothoracic Surgery | Congenital (Simple)  | Ebsteins                              |
| 61 | Cardiothoracic Surgery | Congenital (Simple)  | Fontan                                |
| 62 | Cardiothoracic Surgery | Congenital (Complex) | TAPVC                                 |
| 63 | Cardiothoracic Surgery | Congenital (Complex) | Pulmonary Atresia with or without VSD |
| 64 | Cardiothoracic Surgery | Congenital (Complex) | TGA                                   |
| 65 | Cardiothoracic Surgery | Congenital (Complex) | Arterial Switch Operation             |
| 66 | Cardiothoracic Surgery | Congenital (Complex) | Sennings                              |
| 67 | Cardiothoracic Surgery | Congenital (Complex) | Mustards                              |
| 68 | Cardiothoracic Surgery | Congenital (Complex) | Pulmonary Conduit                     |
| 69 | Cardiothoracic Surgery | Congenital (Complex) | Truncus Arteriosus Surgery            |

|    |                        |                         |                                                                           |
|----|------------------------|-------------------------|---------------------------------------------------------------------------|
| 70 | Cardiothoracic Surgery | Congenital (Complex)    | Root Replacement (Aortic Aneurysm/ Aortic Dissection) / Bentall Procedure |
| 71 | Cardiothoracic Surgery | Congenital (Complex)    | Aortic Arch Replacement                                                   |
| 72 | Cardiothoracic Surgery | Congenital (Complex)    | Aortic Aneurysm Repair using CPB                                          |
| 73 | Cardiothoracic Surgery | Congenital (Complex)    | Aortic Aneurysm Repair without using CPB                                  |
| 74 | Cardiothoracic Surgery | Acquired                | Pulmonary Embolectomy / Endarterectomy                                    |
| 75 | Cardiothoracic Surgery | Acquired                | Surgery for Cardiac Tumour/ LA Myxoma/ RA Myxoma                          |
| 76 | Cardiothoracic Surgery | Closed Heart Procedures | Closed Mitral Valvotomy                                                   |
| 77 | Cardiothoracic Surgery | Closed Heart Procedures | PDA Closure                                                               |
| 78 | Cardiothoracic Surgery | Closed Heart Procedures | Coarctation Repair                                                        |
| 79 | Cardiothoracic Surgery | Closed Heart Procedures | Coarctation Repair with graft                                             |
| 80 | Cardiothoracic Surgery | Closed Heart Procedures | BT Shunt (inclusives of grafts)                                           |
| 81 | Cardiothoracic Surgery | Closed Heart Procedures | Glenn Shunt                                                               |
| 82 | Cardiothoracic Surgery | Closed Heart Procedures | Central Shunt                                                             |
| 83 | Cardiothoracic Surgery | Closed Heart Procedures | Aortic arch Anamolies                                                     |
| 84 | Cardiothoracic Surgery | Closed Heart Procedures | Pericardiectomy                                                           |
| 85 | Cardiothoracic Surgery | Closed Heart Procedures | Thoracoscopic surgery                                                     |
| 86 | Cardiothoracic Surgery | Cardiac Injuries        | Surgery without CPB                                                       |
| 87 | Cardiothoracic Surgery | Cardiac Injuries        | Surgery with CPB                                                          |
| 88 | Cardiothoracic Surgery | Thoracic Surgery        | Lobectomy                                                                 |
| 89 | Cardiothoracic Surgery | Thoracic Surgery        | Pneumonectomy                                                             |
| 90 | Cardiothoracic Surgery | Thoracic Surgery        | Pleurectomy                                                               |
| 91 | Cardiothoracic Surgery | Thoracic Surgery        | Decortication                                                             |
| 92 | Cardiothoracic Surgery | Thoracic Surgery        | Mediastinotomy                                                            |
| 93 | Cardiothoracic Surgery | Thoracic Surgery        | Pulmonary AV Fistula surgery                                              |
| 94 | Cardiothoracic Surgery | Thoracic Surgery        | Lung Cyst                                                                 |
| 95 | Cardiothoracic Surgery | Thoracic Surgery        | SOL mediastinum                                                           |
| 96 | Cardiothoracic Surgery | Thoracic Surgery        | Surgical Correction of Bronchopleural Fistula.                            |
| 97 | Cardiothoracic Surgery | Thoracic Surgery        | Diaphragmatic Eventeration                                                |
| 98 | Cardiothoracic Surgery | Thoracic Surgery        | Diaphragmatic Hernia                                                      |
| 99 | Cardiothoracic         | Thoracic Surgery        | Oesophageal Diverticula /Achalasia Cardia                                 |

|     |                        |                                   |                                                                                                 |
|-----|------------------------|-----------------------------------|-------------------------------------------------------------------------------------------------|
|     | Surgery                |                                   |                                                                                                 |
| 100 | Cardiothoracic Surgery | Thoracic Surgery                  | Diaphragmatic Injuries                                                                          |
| 101 | Cardiothoracic Surgery | Thoracic Surgery                  | Thoracotomy, Thoraco Abdominal Approach                                                         |
| 102 | Cardiothoracic Surgery | Thoracic Surgery                  | Foreign Body Removal with scope                                                                 |
| 103 | Cardiothoracic Surgery | Thoracic Surgery                  | Bronchial Repair Surgery for Injuries due to FB                                                 |
| 104 | Cardiothoracic Surgery | Thoracic Surgery                  | Gastro Study Followed by Thoracotomy & Repairs for Oesophageal Injury for Corrosive Injuries/FB |
| 105 | Cardiothoracic Surgery | Thoracic Surgery                  | Oesophageal tumour removal                                                                      |
| 106 | Cardiothoracic Surgery | Thoracic Surgery                  | Oesophagectomy                                                                                  |
| 107 | Cardiothoracic Surgery | Thoracic Surgery (Chest Injuries) | Lung Injury repair                                                                              |
| 108 | Cardiothoracic Surgery | Thoracic Surgery (Chest Injuries) | Diaphragmatic injury repair                                                                     |
| 109 | Cardiothoracic Surgery | Thoracic Surgery (Chest Injuries) | Thyomectomy                                                                                     |
| 110 | Cardiovascular Surgery | Vascular                          | Patch Graft Angioplasty                                                                         |
| 111 | Cardiovascular Surgery | Vascular                          | Femoropopliteal by pass procedure with graft (inclu. Graft)                                     |
| 112 | Cardiovascular Surgery | Vascular                          | Thromboembolectomy                                                                              |
| 113 | Cardiovascular Surgery | Vascular                          | Surgery for Arterial Aneurysm -Distal Abdominal Aorta                                           |
| 114 | Cardiovascular Surgery | Vascular                          | Surgery for Arterial Aneurysm -Upper Abdominal Aorta                                            |
| 115 | Cardiovascular Surgery | Vascular                          | Surgery for Arterial Aneurysm -Vertebral                                                        |
| 116 | Cardiovascular Surgery | Vascular                          | Intrathoracic Aneurysm (without graft)-Aneurysm not Requiring Bypass Techniques                 |
| 117 | Cardiovascular Surgery | Vascular                          | Intrathoracic Aneurysm (with graft) -Requiring Bypass Techniques                                |
| 118 | Cardiovascular Surgery | Vascular                          | Dissecting Aneurysms with CPB (inclu. Graft)                                                    |
| 119 | Cardiovascular Surgery | Vascular                          | Dissecting Aneurysms without CPB (incl. graft)                                                  |
| 120 | Cardiovascular Surgery | Vascular                          | Vascular Procedure – Major Vessels                                                              |
| 121 | Cardiovascular Surgery | Vascular                          | Vascular Procedure – Minor Vessels                                                              |
| 122 | Cardiovascular Surgery | Vascular                          | Surgery for Arterial Aneurysm Renal Artery                                                      |
| 123 | Cardiovascular Surgery | Vascular                          | Surgery for Arterial Aneurysm Carotid                                                           |
| 124 | Cardiovascular Surgery | Vascular                          | Surgery for Arterial Aneurysm Main Arteries of the Limb                                         |
| 125 | Cardiovascular Surgery | Vascular                          | Operations for Acquired Arteriovenous Fistula                                                   |
| 126 | Cardiovascular Surgery | Vascular                          | Congenital Arterio Venous Fistula                                                               |
| 127 | Cardiovascular Surgery | Vascular                          | Operations for Stenosis of Renal Arteries                                                       |

|     |                        |          |                                                       |
|-----|------------------------|----------|-------------------------------------------------------|
| 128 | Cardiovascular Surgery | Vascular | Peripheral Embolectomy without graft                  |
| 129 | Cardiovascular Surgery | Vascular | Aorto Billiac / Bifemoral bypass with Synthetic Graft |
| 130 | Cardiovascular Surgery | Vascular | Axillo bifemoral bypass with Synthetic Graft          |
| 131 | Cardiovascular Surgery | Vascular | Femoro Distal Bypass with Vein Graft                  |
| 132 | Cardiovascular Surgery | Vascular | Femoro Distal Bypass with Synthetic Graft             |
| 133 | Cardiovascular Surgery | Vascular | Axillo Brachial Bypass using with Synthetic Graft     |
| 134 | Cardiovascular Surgery | Vascular | Brachio - Radial Bypass with Synthetic Graft          |
| 135 | Cardiovascular Surgery | Vascular | Excision of Carotid body Tumor with vascular repair   |
| 136 | Cardiovascular Surgery | Vascular | Carotid artery bypass with Synthetic Graft            |
| 137 | Cardiovascular Surgery | Vascular | Excision of Arterio Venous malformation - Large       |
| 138 | Cardiovascular Surgery | Vascular | Excision of Arterio Venous malformation - Small       |
| 139 | Cardiovascular Surgery | Vascular | Arterial Embolectomy                                  |
| 140 | Cardiovascular Surgery | Vascular | D V T - IVC Filter                                    |
| 141 | Cardiovascular Surgery | Vascular | Vascular Tumors                                       |
| 142 | Cardiovascular Surgery | Vascular | Small Arterial Aneurysms - Repair                     |
| 143 | Cardiovascular Surgery | Vascular | Medium size arterial aneurysms - Repair               |
| 144 | Cardiovascular Surgery | Vascular | Medium size arterial aneurysms with synthetic graft   |
| 145 | Cardiovascular Surgery | Vascular | Carotid endarterectomy                                |
| 146 | Genito Urinary Surgery | Urology  | Open Pyelolithotomy                                   |
| 147 | Genito Urinary Surgery | Urology  | Open Nephrolithotomy                                  |
| 148 | Genito Urinary Surgery | Urology  | Open Cystolithotomy                                   |
| 149 | Genito Urinary Surgery | Urology  | VVF Repair                                            |
| 150 | Genito Urinary Surgery | Urology  | Pyeloplasty                                           |
| 151 | Genito Urinary Surgery | Urology  | Cystolithotripsy                                      |
| 152 | Genito Urinary Surgery | Urology  | PCNL (Percutaneous Nephro Lithotomy)                  |
| 153 | Genito Urinary Surgery | Urology  | ESWL (Extra carporial shock-wave lithotripsy)         |
| 154 | Genito Urinary Surgery | Urology  | URSL                                                  |
| 155 | Genito Urinary Surgery | Urology  | Nephrostomy (PCN)                                     |
| 156 | Genito Urinary Surgery | Urology  | DJ stent (One side)                                   |
| 157 | Genito Urinary Surgery | Urology  | Urethronlasty for Stricture Diseases-single stage     |

|     |                        |                                       |                                                                             |
|-----|------------------------|---------------------------------------|-----------------------------------------------------------------------------|
| 158 | Genito Urinary Surgery | Urology                               | Urethroplasty for Stricture Diseases-First Stage                            |
| 159 | Genito Urinary Surgery | Urology                               | Urethroplasty for Stricture Diseases-Second Stage                           |
| 160 | Genito Urinary Surgery | Urology                               | Hypospadiasis(Adult)                                                        |
| 161 | Genito Urinary Surgery | Urology                               | TURBT                                                                       |
| 162 | Genito Urinary Surgery | Urology                               | TURP                                                                        |
| 163 | Genito Urinary Surgery | Urology                               | Simple Nephrectomy                                                          |
| 164 | Genito Urinary Surgery | Urology                               | Lap. Nephrectomy Simple                                                     |
| 165 | Genito Urinary Surgery | Urology                               | Lap. Nephrectomy Radical                                                    |
| 166 | Genito Urinary Surgery | Urology                               | Lap. Partial Nephrectomy                                                    |
| 167 | Medical Oncology       | Breast                                | Adriamycin/Cyclophosphamide (AC)                                            |
| 168 | Medical Oncology       | Breast                                | 5- Fluorouracil A-C (FAC)                                                   |
| 169 | Medical Oncology       | Breast                                | AC (AC then T)                                                              |
| 170 | Medical Oncology       | Breast                                | Paclitaxel                                                                  |
| 171 | Medical Oncology       | Breast                                | Cyclophosphamide/Methotrexate/5Fluorouracil (CMF)                           |
| 172 | Medical Oncology       | Breast                                | Tamoxifen tabs                                                              |
| 173 | Medical Oncology       | Breast                                | Aromatase Inhibitors                                                        |
| 174 | Medical Oncology       | Cervical Cancer                       | Weekly Cisplatin                                                            |
| 175 | Medical Oncology       | Vulval Cancer                         | Cisplatin/5-FU                                                              |
| 176 | Medical Oncology       | Vaginal Cancer                        | Cisplatin/5-FU                                                              |
| 177 | Medical Oncology       | Ovarian Cancer                        | Carboplatin/Paclitaxel                                                      |
| 178 | Medical Oncology       | Ovary Germcell Tumour                 | Bleomycin-Etoposide-Cisplatin (BEP)                                         |
| 179 | Medical Oncology       | Gestational Trophoblast Ds.- Lowrisk  | Weekly Methotrexate                                                         |
| 180 | Medical Oncology       | Gestational Trophoblast Ds.- Lowrisk  | Actinomycin                                                                 |
| 181 | Medical Oncology       | Gestational Trophoblast Ds.- Highrisk | Etoposide-Methotrexate-Actinomycin / Cyclophosphamide -Vincristine (EMA-CO) |
| 182 | Medical Oncology       | Testicular Cancer                     | Bleomycin-Etoposide-Cisplatin (BEP)                                         |
| 183 | Medical Oncology       | Prostate Cancer                       | Hormonal therapy                                                            |
| 184 | Medical Oncology       | Bladder Cancer                        | Weekly Cisplatin                                                            |
| 185 | Medical Oncology       | Bladder Cancer                        | Methotrexate Vinblastine Adriamycin Cyclophosphamide (MVAC)                 |



|     |                  |                                   |                                                                  |
|-----|------------------|-----------------------------------|------------------------------------------------------------------|
| 186 | Medical Oncology | Non-small cell lung cancer        | Cisplatin/Etoposide (IIIB)                                       |
| 187 | Medical Oncology | Oesophageal Cancer                | Cisplatin- 5FU                                                   |
| 188 | Medical Oncology | Gastric Cancer                    | 5-FU -Leucovorin (McDonald Regimen)                              |
| 189 | Medical Oncology | Colorectal Cancer                 | Monthly 5-FU                                                     |
| 190 | Medical Oncology | Colorectal Cancer                 | 5-Fluorouracil-Oxaliplatin -Leucovorin (FOLFOX) (Stage III only) |
| 191 | Medical Oncology | Osteosarcoma Bone Tumors          | Cisplatin/Adriamycin+ifosmide (IAP)                              |
| 192 | Medical Oncology | Lymphoma-Hodgkin disease          | Adriamycin - Bleomycin - Vinblastine Dacarbazine (ABVD)          |
| 193 | Medical Oncology | Lymphoma-NHL                      | Cyclophosphamide - Adriamycin Vincristine - Prednisone (CHOP)    |
| 194 | Medical Oncology | Multiple Myeloma                  | Vincristine, Adriamycin,Dexamethasone(VAD)                       |
| 195 | Medical Oncology | Multiple Myeloma                  | Thalidomide+Dexamethasone(Oral)                                  |
| 196 | Medical Oncology | Multiple Myeloma                  | Melphalan -Prednisone (oral)                                     |
| 197 | Medical Oncology | Wilm's Tumor                      | SIOP/NWTS regimen(Stages I - III)                                |
| 198 | Medical Oncology | Hepatoblastoma Operable           | Cisplatin - Adriamycin                                           |
| 199 | Medical Oncology | Childhood B Cell Lymphomas        | Variable Regimen                                                 |
| 200 | Medical Oncology | Neuroblastoma ( Stages I-III )    | Variable Regimen                                                 |
| 201 | Medical Oncology | Retinoblastoma                    | Carbo/Etoposide/Vincristine                                      |
| 202 | Medical Oncology | Histiocytosis                     | Variable Regimen                                                 |
| 203 | Medical Oncology | Rhabdomyosarcoma                  | Vincristine-Actinomycin-Cyclophosphamide(VactC) based chemo      |
| 204 | Medical Oncology | Ewings sarcoma                    | Variable Regimen                                                 |
| 205 | Medical Oncology | Acute Myeloid Leukemia            | Induction Phase                                                  |
| 206 | Medical Oncology | Acute Myeloid Leukemia            | Consolidation Phase                                              |
| 207 | Medical Oncology | Acute Lymphoblastic Leukemia      | Induction phase 1st and 2nd months                               |
| 208 | Medical Oncology | Acute Lymphoblastic Leukemia      | 3rd, 4th, 5th                                                    |
| 209 | Medical Oncology | Acute Lymphoblastic Leukemia      | Maintenance                                                      |
| 210 | Medical Oncology | unlisted regimen                  | Palliative Chemotherapy                                          |
| 211 | Medical Oncology | For Terminally ill cancer patient | Palliative and Supportive Therapy                                |
| 212 | Medical Oncology | Colorectal Cancer Stage 2 & 3     | XELOX along with Adjuvant chemotherapy                           |
| 213 | Medical Oncology | MULTIPLE MYELOMA                  | Zoledronic acid along with Adjuvant Chemotherapy of AS-I         |

|     |                  |                                |                                                                                                                                               |
|-----|------------------|--------------------------------|-----------------------------------------------------------------------------------------------------------------------------------------------|
| 214 | Medical Oncology | Febrile Neutropenia-Highrisk-1 | 1ST Line iv antibiotics And other supportive therapy ( third generation cephalosporin, aminoglycoside etc.,)                                  |
| 215 | Medical Oncology | Febrile Neutropenia-Highrisk-2 | 2nd line iv antibiotics and other supportive therapy(Carbapenems, Fourth generation cephalosporins, Piperacillin, anti-fungal - azoles etc.,) |
| 216 | Neuro Surgery    | Brain                          | Craniotomy and Evacuation of Haematoma -Subdural                                                                                              |
| 217 | Neuro Surgery    | Brain                          | Craniotomy and Evacuation of Haematoma -Extradural                                                                                            |
| 218 | Neuro Surgery    | Brain Tumor                    | Excision of Brain Tumor Supratentorial-Parasagittal                                                                                           |
| 219 | Neuro Surgery    | Brain Tumour                   | Excision of Brain Tumor Supratentorial-Basal                                                                                                  |
| 220 | Neuro Surgery    | Brain Tumour                   | Excision of Brain Tumor Supratentorial-Brainstem                                                                                              |
| 221 | Neuro Surgery    | Brain Tumour                   | Excision of Brain Tumor Supratentorial-C P Angle                                                                                              |
| 222 | Neuro Surgery    | Brain Tumour                   | Excision of Brain Tumor Supratentorial & others                                                                                               |
| 223 | Neuro Surgery    | Brain Tumour                   | Excision of Brain Tumors -Subtentorial                                                                                                        |
| 224 | Neuro Surgery    | Brain Tumour                   | Image Guided Biopsy                                                                                                                           |
| 225 | Neuro Surgery    | Brain                          | Intervention with coiling                                                                                                                     |
| 226 | Neuro Surgery    | Brain                          | Ventriculoatrial /Ventriculoperitoneal Shunt                                                                                                  |
| 227 | Neuro Surgery    | Brain                          | Twist Drill Craniostomy                                                                                                                       |
| 228 | Neuro Surgery    | Brain                          | Subdural Tapping                                                                                                                              |
| 229 | Neuro Surgery    | Brain                          | Abscess Tapping Single                                                                                                                        |
| 230 | Neuro Surgery    | Brain                          | Abscess Tapping multiple                                                                                                                      |
| 231 | Neuro Surgery    | Brain                          | Meningo Encephalocele                                                                                                                         |
| 232 | Neuro Surgery    | Brain                          | Meningomyelocele                                                                                                                              |
| 233 | Neuro Surgery    | Brain                          | C.S.F. Rhinorrhoea                                                                                                                            |
| 234 | Neuro Surgery    | Brain                          | Cranioplasty                                                                                                                                  |
| 235 | Neuro Surgery    | Brain                          | Meningocele Excision                                                                                                                          |
| 236 | Neuro Surgery    | Brain                          | Excision of Brain Abcess                                                                                                                      |
| 237 | Neuro Surgery    | Brain                          | Aneurysm Clipping                                                                                                                             |
| 238 | Neuro Surgery    | Brain                          | Carotid angioplasty with stent                                                                                                                |
| 239 | Neuro Surgery    | Brain                          | Carotid angioplasty without stent                                                                                                             |
| 240 | Neuro Surgery    | Brain                          | External Ventricular Drainage (EVD)                                                                                                           |
| 241 | Neuro Surgery    | Spinal                         | Spinal Cord Tumours                                                                                                                           |
| 242 | Neuro Surgery    | Spinal                         | Excision of Cervical Inter-Vertebral Discs                                                                                                    |
| 243 | Neuro Surgery    | Spinal                         | Posterior Cervical Discectomy                                                                                                                 |
| 244 | Neuro Surgery    | Spinal                         | Anterior Cervical Discectomy                                                                                                                  |
| 245 | Neuro Surgery    | Spinal                         | Anterior Cervical Spine Surgery with fusion                                                                                                   |
| 246 | Neuro Surgery    | Spinal                         | Anterio Lateral Decompression                                                                                                                 |
| 247 | Neuro Surgery    | Spinal                         | Laminectomy-Cervical                                                                                                                          |
| 248 | Neuro Surgery    | Spinal                         | Discectomy-Dorso Lumbar                                                                                                                       |
| 249 | Neuro Surgery    | Spinal                         | Discectomy-Lumbar                                                                                                                             |
| 250 | Neuro Surgery    | Spinal                         | Discectomy + cost of implant                                                                                                                  |
| 251 | Neuro Surgery    | Spinal                         | Spinal Fusion Procedure                                                                                                                       |
| 252 | Neuro Surgery    | Spinal                         | Spinal Intra Medullary Tumours                                                                                                                |
| 253 | Neuro Surgery    | Spinal                         | Spina Bifida Surgery Major                                                                                                                    |
| 254 | Neuro Surgery    | Spinal                         | Spina Bifida Surgery Minor                                                                                                                    |
| 255 | Neuro Surgery    | Spinal                         | Stereotaxic Procedures                                                                                                                        |
| 256 | Neuro Surgery    | Spinal                         | Vertebral artery Stenting                                                                                                                     |
| 257 | Neuro Surgery    | AAD Surgeries                  | Transoral surgery and CV Junction                                                                                                             |
| 258 | Neuro Surgery    | AAD Surgeries                  | Trans oral Surgery                                                                                                                            |
| 259 | Neuro Surgery    | Brain                          | Trans Sphenoidal Surgery                                                                                                                      |
| 260 | Neuro Surgery    | Spinal                         | RF Lesions for Trigeminal Neuralgia                                                                                                           |

|     |                      |                                      |                                                                                                                   |
|-----|----------------------|--------------------------------------|-------------------------------------------------------------------------------------------------------------------|
| 261 | Neuro Surgery        | Spinal                               | Anterior discectomy & bone grafting                                                                               |
| 262 | Neuro Surgery        | Spinal                               | Corpectomy for Spinal Fixation                                                                                    |
| 263 | Neuro Surgery        | Spinal                               | Spinal Fixation Rods and Plates                                                                                   |
| 264 | Neuro Surgery        | Neuro Surgery                        | Muscle Biopsy with report                                                                                         |
| 265 | Neuro Surgery        | Spinal                               | MVD                                                                                                               |
| 266 | Neuro Surgery        | Neuro Surgery                        | Nerve Biopsy with report                                                                                          |
| 267 | Neuro Surgery        | Neuro Surgery                        | Nerve Decompression                                                                                               |
| 268 | Neuro Surgery        | Neuro Surgery                        | Parasagittal SOL                                                                                                  |
| 269 | Neuro Surgery        | Neuro Surgery                        | Peripheral Nerve Surgery Major                                                                                    |
| 270 | Neuro Surgery        | Neuro Surgery                        | Peripheral Nerve Surgery Minor                                                                                    |
| 271 | Paediatric Surgeries | Gastro Intestinal Tract              | Oesophageal Atresia                                                                                               |
| 272 | Paediatric Surgeries | Gastro Intestinal Tract              | Diaphragmatic Hernia                                                                                              |
| 273 | Paediatric Surgeries | Gastro Intestinal Tract              | Intestinal Atresias & Obstructions                                                                                |
| 274 | Paediatric Surgeries | Gastro Intestinal Tract              | Biliary Atresia & Choledochal Cyst                                                                                |
| 275 | Paediatric Surgeries | Gastro Intestinal Tract              | Anorectal Malformations Stage 1                                                                                   |
| 276 | Paediatric Surgeries | Gastro Intestinal Tract              | Anorectal Malformations Stage 2                                                                                   |
| 277 | Paediatric Surgeries | Genito Urinary Surgeries             | Hypospadias                                                                                                       |
| 278 | Polytrauma           | Polytrauma                           | Nerve and tendon repair + Vascular repair                                                                         |
| 279 | Polytrauma           | Polytrauma                           | Nerve & Tendon Repair + Vascular Repair (Grade-I& II)                                                             |
| 280 | Polytrauma           | Polytrauma                           | Nerve & Tendon Repair + Vascular Repair (Grade-III)                                                               |
| 281 | Polytrauma           | Plastic Surgery                      | Flap cover Surgery for wound in compound fracture                                                                 |
| 282 | Polytrauma           | Polytrauma                           | Other Small bone fractures/K-wiring (To be covered along with other injuries only and not as exclusive procedure) |
| 283 | Polytrauma           | Polytrauma                           | Surgery for Patella fracture (To be covered along with other injuries only and not as exclusive procedure)        |
| 284 | Polytrauma           | Plastic Surgery                      | Facial bone fractures (Facio-Maxillary Injuries)                                                                  |
| 285 | Polytrauma           | Pelvic Bone Fractures                | Surgical Correction of Pelvic bone fractures.                                                                     |
| 286 | Radiation Oncology   | Brain Tumour                         | Gamma Knife / Cyber Knife                                                                                         |
| 287 | Radiation Oncology   | Cobalt 60 External Beam Radiotherapy | Radical Treatment                                                                                                 |
| 288 | Radiation Oncology   | Cobalt 60 External Beam Radiotherapy | Palliative Treatment                                                                                              |
| 289 | Radiation Oncology   | Cobalt 60 External Beam Radiotherapy | Adjuvent Therapy                                                                                                  |
| 290 | Radiation Oncology   | Linear Accelerators                  | Radical Treatment with Photons (linear accelarator)                                                               |
| 291 | Radiation Oncology   | Linear Accelerators                  | Palliative Treatment with Photons (linear accelarator)                                                            |
| 292 | Radiation Oncology   | Linear Accelerators                  | Adjuvant Treatment with Photons/Electrons                                                                         |
| 293 | Radiation Oncology   | Brachytherapy-Intracavitary-i        | i. LDR per application (Brachytherapy-intracavitary)                                                              |
| 294 | Radiation Oncology   | Brachytherapy-Intracavitary-ii       | ii. HDR per application                                                                                           |
| 295 | Radiation Oncology   | Brachytherapy-Interstitial-i         | i. LDR per application                                                                                            |

|     |                    |                               |                                                       |
|-----|--------------------|-------------------------------|-------------------------------------------------------|
| 296 | Radiation Oncology | Brachytherapy-Interstitial-ii | ii. HDR - one application and multiple dose fractions |
| 297 | Surgical Oncology  | Esophagus                     | Hiatus Hernia Repair                                  |
| 298 | Surgical Oncology  | Ear                           | Labyrinthectomy                                       |
| 299 | Surgical Oncology  | Throat                        | Microlaryngeal Surgery including Phonosurgery         |
| 300 | Surgical Oncology  | Throat                        | Excision/ Hypopharynx of Tumors in Pharynx            |
| 301 | Surgical Oncology  | Pancreas                      | Distal Pancreatectomy                                 |
| 302 | Surgical Oncology  | Pancreas                      | Enucleation of Cyst                                   |
| 303 | Surgical Oncology  | Pancreas                      | Whipples - any type                                   |
| 304 | Surgical Oncology  | Spleen                        | Splenectomy                                           |
| 305 | Surgical Oncology  | Genito Urinary System         | Radical Nephrectomy                                   |
| 306 | Surgical Oncology  | Genito Urinary System         | Radical Cystectomy                                    |
| 307 | Surgical Oncology  | Genito Urinary System         | Other cystectomies                                    |
| 308 | Surgical Oncology  | Genito Urinary System         | High Orchidectomy                                     |
| 309 | Surgical Oncology  | Genito Urinary System         | Bilateral Orchidectomy                                |
| 310 | Surgical Oncology  | Genito Urinary System         | Emasculation                                          |
| 311 | Surgical Oncology  | Genito Urinary System         | Total Penectomy                                       |
| 312 | Surgical Oncology  | Genito Urinary System         | Inguinal Block Dissection-one side                    |
| 313 | Surgical Oncology  | Genito Urinary System         | Radical Prostatectomy                                 |
| 314 | Surgical Oncology  | Genito Urinary System         | Partial Penectomy                                     |
| 315 | Surgical Oncology  | Gynaec                        | Radical Hysterectomy                                  |
| 316 | Surgical Oncology  | Gynaec                        | Surgery for Ca Ovary - early stage                    |
| 317 | Surgical Oncology  | Gynaec                        | Surgery for Ca Ovary - advance stage                  |
| 318 | Surgical Oncology  | Gynaec                        | Vulvectomy                                            |
| 319 | Surgical Oncology  | Breast                        | Mastectomy - any type                                 |
| 320 | Surgical Oncology  | Breast                        | Axillary Dissection                                   |
| 321 | Surgical Oncology  | Breast                        | Wide excision                                         |
| 322 | Surgical Oncology  | Breast                        | Wide excision + Reconstruction                        |
| 323 | Surgical Oncology  | Lung Cancer                   | Pneumonectomy                                         |
| 324 | Surgical Oncology  | Lung Cancer                   | Lobectomy                                             |
| 325 | Surgical           | Lung Cancer                   | Decortication                                         |

|     |                   |                             |                                                |
|-----|-------------------|-----------------------------|------------------------------------------------|
|     | Oncology          |                             |                                                |
| 326 | Surgical Oncology | Lung Cancer                 | Surgical Correction of Bronchopleural Fistula. |
| 327 | Surgical Oncology | Head & Neck                 | Resection of Nasopharyngeal Tumor              |
| 328 | Surgical Oncology | Head & Neck                 | Lateral Temporal bone resection                |
| 329 | Surgical Oncology | Head & Neck                 | Subtotal Temporal bone resection               |
| 330 | Surgical Oncology | Head & Neck                 | Total Temporal bone resection                  |
| 331 | Surgical Oncology | Head & Neck                 | Composite Resection & Reconstruction           |
| 332 | Surgical Oncology | Head & Neck                 | Neck Dissection - any type                     |
| 333 | Surgical Oncology | Head & Neck                 | Hemiglossectomy                                |
| 334 | Surgical Oncology | Head & Neck                 | Maxillectomy - any type                        |
| 335 | Surgical Oncology | Head & Neck                 | Thyroidectomy - any type                       |
| 336 | Surgical Oncology | Head & Neck                 | Parotidectomy - any type                       |
| 337 | Surgical Oncology | Head & Neck                 | Laryngectomy - any type                        |
| 338 | Surgical Oncology | Head & Neck                 | Laryngopharyngo Oesophagectomy                 |
| 339 | Surgical Oncology | Head & Neck                 | Hemimandibulectomy                             |
| 340 | Surgical Oncology | Head & Neck                 | Wide excision                                  |
| 341 | Surgical Oncology | Ca. Salivary Gland          | Submandibular Gland Excision                   |
| 342 | Surgical Oncology | Ca. Trachea                 | Tracheal Resection                             |
| 343 | Surgical Oncology | Ca. Trachea                 | Sternotomy + Superior Mediastinal Dissection   |
| 344 | Surgical Oncology | Ca. Parathyroid             | Parathyroidectomy                              |
| 345 | Surgical Oncology | Ca. Gastro Intestinal Tract | Small bowel resection                          |
| 346 | Surgical Oncology | Ca. Gastro Intestinal Tract | Closure of Ileostomy/ Colostomy                |
| 347 | Surgical Oncology | Ca. Rectum                  | Abdomino Perineal Resection (APR) + Sacrectomy |
| 348 | Surgical Oncology | Ca. Gall Bladder            | Radical Cholecystectomy                        |
| 349 | Surgical Oncology | Spleen                      | Radical Splenectomy                            |
| 350 | Surgical Oncology | Gastro Intestinal System    | Resection of Retroperitoneal Tumors            |
| 351 | Surgical Oncology | Gastro Intestinal System    | Abdominal wall tumor Resection                 |
| 352 | Surgical Oncology | Gastro Intestinal System    | Resection with reconstruction                  |
| 353 | Surgical Oncology | Urinary Bladder             | Bilateral pelvic lymph Node Dissection(BPLND)  |
| 354 | Surgical Oncology | Gastro Intestinal System    | Oesophagectomy - any type                      |

|     |                   |                           |                                                                                                                                      |
|-----|-------------------|---------------------------|--------------------------------------------------------------------------------------------------------------------------------------|
| 355 | Surgical Oncology | Gastro Intestinal System  | Gastrectomy - any type                                                                                                               |
| 356 | Surgical Oncology | Gastro Intestinal System  | Colectomy - any type                                                                                                                 |
| 357 | Surgical Oncology | Gastro Intestinal System  | Anterior Resection                                                                                                                   |
| 358 | Surgical Oncology | Gastro Intestinal System  | Abdominoperineal Resection                                                                                                           |
| 359 | Surgical Oncology | Gastro Intestinal System  | Triple Bypass                                                                                                                        |
| 360 | Surgical Oncology | Gastro Intestinal System  | Other Bypasses-Pancreas                                                                                                              |
| 361 | Surgical Oncology | Gynaec                    | Radical Trachelectomy                                                                                                                |
| 362 | Surgical Oncology | Gynaec                    | Radical vaginectomy                                                                                                                  |
| 363 | Surgical Oncology | Gynaec                    | Radical vaginectomy + Reconstruction                                                                                                 |
| 364 | Surgical Oncology | Gynaec-Ca.Cervix          | Radical Hysterectomy +Bilateral Pelvic Lymph Node Dissection (BPLND) + Bilateral Salpingo Oophorectomy (BSO) / Ovarian transposition |
| 365 | Surgical Oncology | Gynaec-Ca.Cervix          | Anterior Exenteration (Gynaec)                                                                                                       |
| 366 | Surgical Oncology | Gynaec-Ca.Cervix          | Posterior Exenteration (Gynaec)                                                                                                      |
| 367 | Surgical Oncology | Gynaec-Ca.Cervix          | Total Pelvic Exenteration                                                                                                            |
| 368 | Surgical Oncology | Chest                     | Chest wall resection for SOFT tissue bone tumors                                                                                     |
| 369 | Surgical Oncology | Chest                     | Chest wall resection + Reconstruction                                                                                                |
| 370 | Surgical Oncology | Bone / soft tissue tumors | Limb salvage surgery for Bone Tumors with modular Prosthesis                                                                         |
| 371 | Surgical Oncology | Bone / soft tissue tumors | Forequarter amputation                                                                                                               |
| 372 | Surgical Oncology | Bone / soft tissue tumors | Hemipelvectomy                                                                                                                       |
| 373 | Surgical Oncology | Bone / soft tissue tumors | Bone resection                                                                                                                       |
| 374 | Surgical Oncology | Renal Cell Cancer         | Partial Nephrectomy                                                                                                                  |
| 375 | Surgical Oncology | Renal Cell Cancer         | Nephroureterectomy for Transitional Cell Carcinoma of renal pelvis (one side)                                                        |
| 376 | Surgical Oncology | Testes cancer             | Retro Peritoneal Lymph Node Dissection(RPLND) (for Residual Disease)                                                                 |
| 377 | Surgical Oncology | Tumours                   | Adrenalectomy                                                                                                                        |
| 378 | Surgical Oncology | Testes cancer             | Urinary diversion                                                                                                                    |
| 379 | Surgical Oncology | Testes cancer             | Retro Peritoneal Lymph Node Dissection RPLND as part of staging                                                                      |
| 380 | Surgical Oncology | Ca. Urinary Bladder       | Anterior Exenteration (Urinary Bladder)                                                                                              |
| 381 | Surgical Oncology | Ca. Urinary Bladder       | Total Exenteration (Urinary Bladder)                                                                                                 |
| 382 | Surgical Oncology | Ca. Urinary Bladder       | Bilateral pelvic lymph Node Dissection(BPLND)                                                                                        |
| 383 | Surgical Oncology | Thoracic and Mediastinum  | Mediastinal tumor resection                                                                                                          |
| 384 | Surgical Oncology | Lung                      | Lung metastatectomy - solitary                                                                                                       |

|     |                   |                             |                                                                |
|-----|-------------------|-----------------------------|----------------------------------------------------------------|
|     | Oncology          |                             |                                                                |
| 385 | Surgical Oncology | Lung                        | Lung metastatectomy - Multiple                                 |
| 386 | Surgical Oncology | Lung                        | Sleeve resection of Lung cancer.                               |
| 387 | Surgical Oncology | Esophagus                   | Oesophagectomy with Two field Lymphadenectomy                  |
| 388 | Surgical Oncology | Esophagus                   | Oesophagectomy with Three field Lymphadenectomy                |
| 389 | Surgical Oncology | Palliative Surgeries        | Tracheostomy                                                   |
| 390 | Surgical Oncology | Palliative Surgeries        | Gastrostomy                                                    |
| 391 | Surgical Oncology | Palliative Surgeries        | Jejunostomy                                                    |
| 392 | Surgical Oncology | Palliative Surgeries        | Ileostomy                                                      |
| 393 | Surgical Oncology | Palliative Surgeries        | Colostomy                                                      |
| 394 | Surgical Oncology | Palliative Surgeries        | Suprapubic Cystostomy                                          |
| 395 | Surgical Oncology | Palliative Surgeries        | Gastro Jejunostomy                                             |
| 396 | Surgical Oncology | Palliative Surgeries        | Ileotransverse Colostomy                                       |
| 397 | Surgical Oncology | Palliative Surgeries        | Substernal bypass                                              |
| 398 | Surgical Oncology | Reconstruction              | Myocutaneous / cutaneous flap                                  |
| 399 | Surgical Oncology | Reconstruction              | Micro vascular reconstruction                                  |
| 400 | Surgical Oncology | Soft Tissue and Bone Tumors | Wide excision - for soft tissue and bone tumors                |
| 401 | Surgical Oncology | Soft Tissue and Bone Tumors | Wide excision + Reconstruction for soft tissue and bone tumors |
| 402 | Surgical Oncology | Soft Tissue and Bone Tumors | Amputation for bone / soft tissue tumours (Major / Minor)      |
